# Supplementary material
Source: PubMed Central journal article supplement (PMC2955190)
Supplement: NIHMS213552-supplement-01.pdf [file NIHMS213552-supplement-01.pdf]

Supplemental Table 1. Technical Data Sheets for dietary information on both A. Chow (2018SX Teklad Global 18% Protein Extruded Rodent Diet) and B. Liquid Diets (PMI Micro-Stabilized Alcohol Rodent Liquid diet LD 101A ). Differences are seen in protein, minerals, vitamins and some nutrients.

#### A. 2018SX Teklad Global 18% Protein Extruded

##### 2018SX Teklad Global 18% Protein Rodent Diet

**(Sterilizable)** is designed and manufactured with high quality ingredients. 2018S is a **fixed formula** diet containing a minimum of 18% protein and 5% fat.

##### Vitamins

Vitamin A iu/g 30.7  
*Retinol* mg/kg 9.3  
 Vitamin D3 iu/g 2.1  
*Cholecalciferol* ug/kg 51  
 Vitamin E (a-tocopherol) mg/kg 128.0  
 Vitamin K3 (menadione) mg/kg 102.0  
 Vitamin B1 (thiamine) mg/kg 117.6  
 Vitamin B2 (riboflavin) mg/kg 27.2  
 Avail. Niacin (nicotinic acid) mg/kg 87.3  
 Vitamin B6 (pyridoxine) mg/kg 26.8  
 Pantothenic Acid mg/kg 141.6  
 Vitamin B12 (cyanocobalamin) ug/kg 150  
 Avail. Biotin mg/kg 0.8  
 Folate mg/kg 8.4  
 Vitamin C mg/kg —  
 Choline mg/kg 1120.0  
 B Carotene mg/kg 2.5  
 Inositol mg/kg 1450.0

##### Fatty Acids

C16:0 Palmitic g/kg 7.6  
 C18:0 Stearic g/kg 1.5  
 C18:1 $\omega$ 9 Oleic g/kg 12.6  
 C18:2 $\omega$ 6 Linoleic g/kg 31.3  
 C18:3 $\omega$ 3 Linolenic g/kg 2.8  
 Total Saturated g/kg 9.6  
 Total Monounsaturated g/kg 12.8  
 Total Polyunsaturated g/kg 34.1

Cholesterol mg/kg —  
 \*Calculations performed using values of 4 kcal/g for protein and carbohydrate and 9 kcal/g for oil (fat).

##### Macronutrients

Crude Protein % 18.8  
 Crude Oil (Fat) % 6.0  
 Crude Fiber % 3.8  
 Ash % 5.9  
 Carbohydrate (available) % 50.0  
 Starch % 45.0  
 Sugar % 5.0  
 Digestible Energy<sup>t</sup> Kcal/g (MJ/kg) 3.4(14.0)  
 Metabolizable Energy<sup>t</sup> Kcal/g (MJ/kg) 3.3(13.7)  
 Calories from Protein\* % 23  
 Calories from Fat\* % 17  
 Calories from Carbohydrate\* % 60

##### Minerals

Calcium % 1.00  
 Phosphorus % 0.65  
 Sodium % 0.23  
 Potassium % 0.68  
 Chloride % 0.40  
 Magnesium % 0.20  
 Zinc mg/kg 77.0  
 Manganese mg/kg 118.0  
 Copper mg/kg 15.0  
 Iodine (added) mg/kg 12.0  
 Iron mg/kg 225.0  
 Selenium ug/kg 200

Cobalt ug/kg 600  
 Chromium ug/kg 500  
**Amino Acids**  
 Aspartic Acid % 1.42  
 Glutamic Acid % 3.70  
 Alanine % 1.08  
 Glycine % 0.79  
 Threonine % 0.67  
 Proline % 1.55  
 Serine % 0.97  
 Leucine % 1.94  
 Isoleucine % 0.85  
 Valine % 0.95  
 Phenylalanine % 0.99  
 Tyrosine % 0.61  
 Phe + Tyr % 1.60  
 Methionine % 0.43  
 Cystine % 0.33  
 Met + Cyst % 0.76  
 Lysine % 1.03  
 Histidine % 0.47  
 Arginine % 1.06  
 Tryptophan % 0.20  
 Available Lysine % 0.83

B. Micro-Stabilized Alcohol Rodent Liquid Diet Mix – LD 101A

#### GUARANTEED ANALYSIS

|                             |       |
|-----------------------------|-------|
| Crude protein not less than | 26.0% |
| Crude fat not less than     | 24.5% |
| Crue fiber not more than    | 16.5% |
| Ash not more than           | 8.2%  |

Diet composition varies according to the amount of alcohol added to maintain an isocaloric diet. T  
 For Calculation purposes:

- 140 gm dry Alcohol Rodent Liquid Diet mix=640 kcal.
- Ethanol=7.07 kcal/gm
- PMI Maltodextrin LD 104=4.0 kcal/gm

#### CHEMICAL COMPOSITION<sup>1</sup>

| <b>Nutrients (2)</b>          | Recon- stituted <sup>2</sup> | Dry Powder  |
|-------------------------------|------------------------------|-------------|
| <b>Protein, %</b>             | <b>4.24</b>                  | <b>30.3</b> |
| Arginine, %                   | 0.16                         | 1.15        |
| Cystine, %                    | 0.07                         | 0.49        |
| Glycine, %                    | 0.09                         | 0.65        |
| Histidine, %                  | 0.12                         | 0.86        |
| Isoleucine, %                 | 0.22                         | 1.54        |
| Leucine, %                    | 0.39                         | 2.80        |
| Lysine, %                     | 0.33                         | 2.34        |
| Methionine, %                 | 0.14                         | 1.04        |
| Phenylalanine, %              | 0.22                         | 1.55        |
| Tyrosine, %                   | 0.23                         | 1.62        |
| Threonine, %                  | 0.18                         | 1.26        |
| Tryptophan, %                 | 0.05                         | 0.35        |
| Valine, %                     | 0.26                         | 1.85        |
| <b>Fat (ether extract), %</b> | <b>3.9</b>                   | <b>27.8</b> |

|                         |             |            |
|-------------------------|-------------|------------|
| <b>Fiber (Crude), %</b> | <b>0.69</b> | <b>5.0</b> |
|-------------------------|-------------|------------|

**Minerals**

|                 |      |      |
|-----------------|------|------|
| Calcium, %      | 0.14 | 0.98 |
| Phosphorus, %   | 0.11 | 0.77 |
| Potassium, %    | 0.12 | 0.87 |
| Magnesium, %    | 0.03 | 0.18 |
| Sulfur, %       | 0.04 | 0.30 |
| Sodium, %       | 0.03 | 0.24 |
| Chlorine, %     | 0.05 | 0.36 |
| Fluorine, ppm   | 0.25 | 1.8  |
| Iron, ppm       | 18   | 130  |
| Zinc, ppm       | 7.8  | 56   |
| Manganese, ppm  | 14   | 98   |
| Copper, ppm     | 1.5  | 11   |
| Chromium, ppm   | 0.58 | 4.2  |
| Iodine, ppm     | 0.05 | 0.37 |
| Molybdenum, ppm | 0.11 | 0.80 |
| Selenium, ppm   | 0.03 | 0.20 |

**Vitamins**

|                                       |      |      |
|---------------------------------------|------|------|
| Vitamin K (as menadione), ppm         | 0.25 | 1.8  |
| Thiamin Hydrochloride, ppm            | 1.5  | 10   |
| Riboflavin, ppm                       | 1.5  | 11   |
| Niacin, ppm                           | 7.4  | 53   |
| Pantothenic Acid, ppm                 | 3.6  | 26   |
| Choline Chloride, ppm                 | 265  | 1900 |
| Folic Acid, ppm                       | 0.50 | 3.6  |
| Pyridoxine, ppm                       | 1.4  | 10   |
| Biotin, ppm                           | 0.05 | 0.36 |
| Inositol, ppm                         | 25   | 180  |
| p-aminobenzoic acid, ppm              | 12.5 | 89   |
| B <sub>12</sub> , mcg/kg              | 25   | 180  |
| Vitamin A, IU/gm                      | 3.0  | 21   |
| Vitamin D <sub>3</sub> (added), IU/gm | 0.40 | 2.9  |
| Vitamin E, IU/kg                      | 30   | 210  |
| Ascorbic Acid, mg/gm                  | 10   | 43   |

**Energy\***

|                        |     |
|------------------------|-----|
| Protein, kcal/kg       | 180 |
| Fat, kcal/kg           | 350 |
| Carbohydrates, kcal/kg | 110 |
